# Supplementary material
Source: PubMed Central journal article supplement (PMC3877795)
Supplement: supp_tpc.113.115428_tpc115428Supplemental.pdf [file supp_tpc.113.115428_tpc115428Supplemental.pdf]

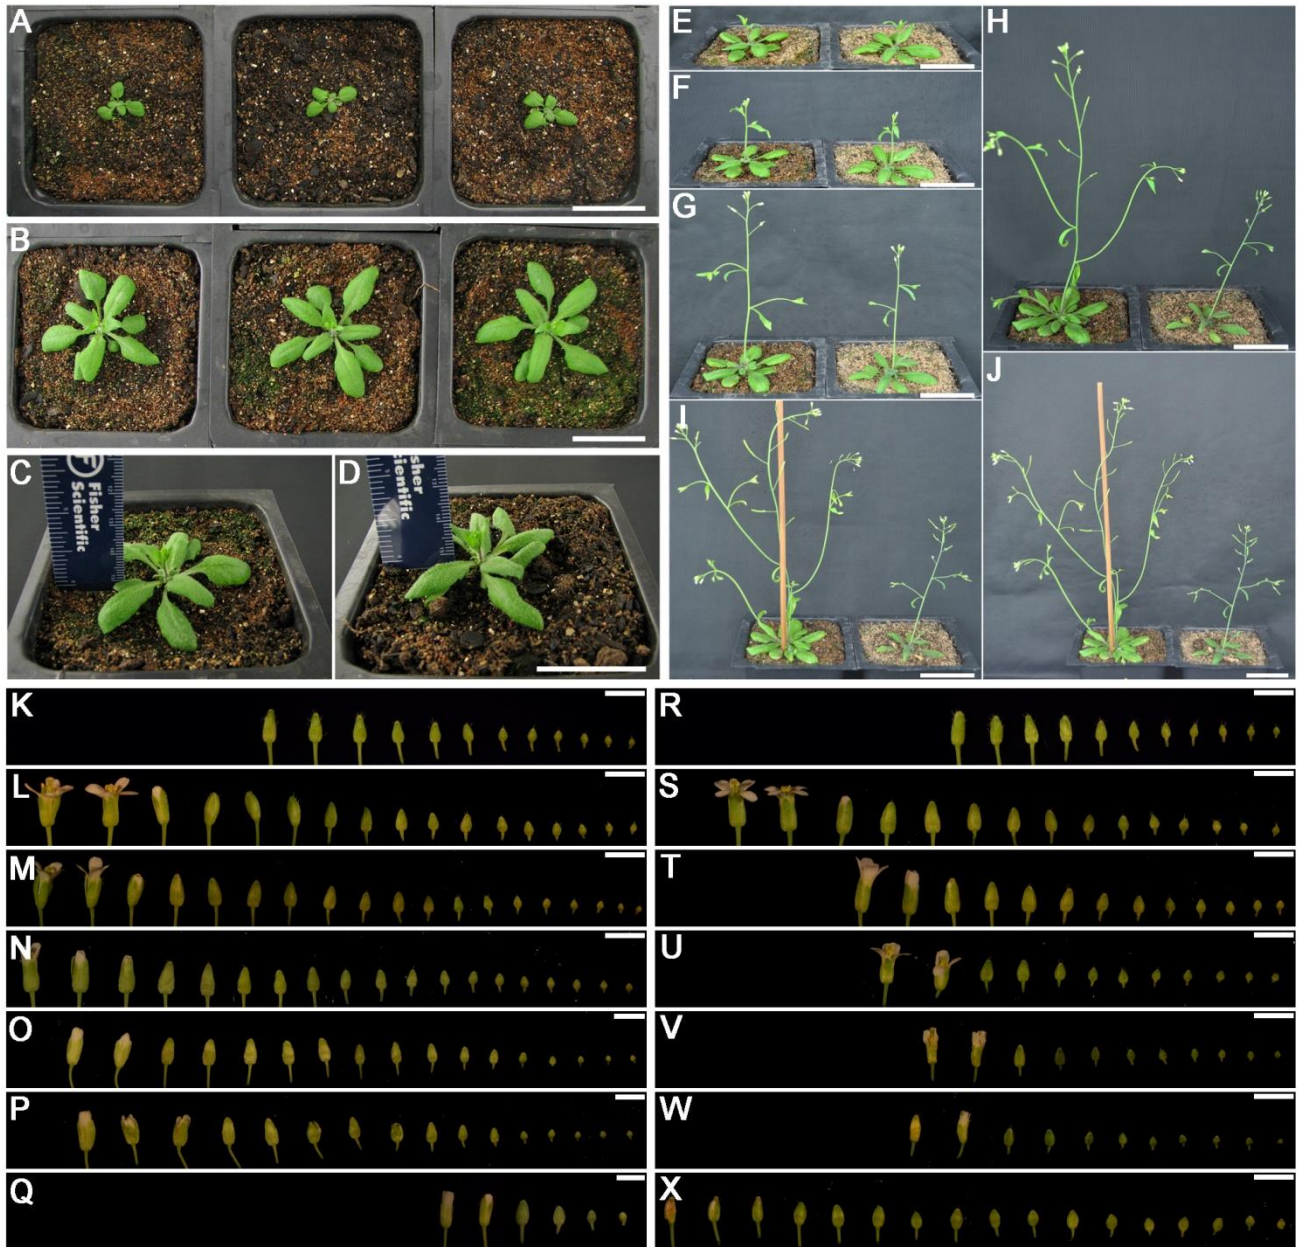

**Supplemental Figure 1.** Phenotypic Comparison of WW Plants and DT Plants.

(A) The photo was taken after the plants were put inside the growth chamber for 18 days. (B) The photo was taken after the plants were put inside the growth chamber for 24 days. (C) The plant to be well-watered which has around 1 cm main stem at day 24. (D) The plant to be treated with drought which has around 1 cm main stem at day 24. (E) At C1/T1, the plants grew over 25 days and had been treated with drought for 1 day. (F) C2/T2. (G) C4/T4. (H) C6/T6. (I) C8/T8. (J) C9/T9. At this

time point, the plants grew over 34 days and had been treated for 10 day. Scale bars for A-J, 3 cm. **(K)-(Q)** The floral buds (stage 8-12) and 0-2 flowers from WW plants at C0(**K**), C3(**L**), C5(**M**), C7(**N**), C10(**O**), C12(**P**), and C15(**Q**). **(R)-(X)** The floral buds and 0-2 flowers from DT plant at T0(**R**), T3(**S**), T5(**T**), T7(**U**), T10(**V**), T12(**W**), and T15(**X**). Scale bars, 2 mm.

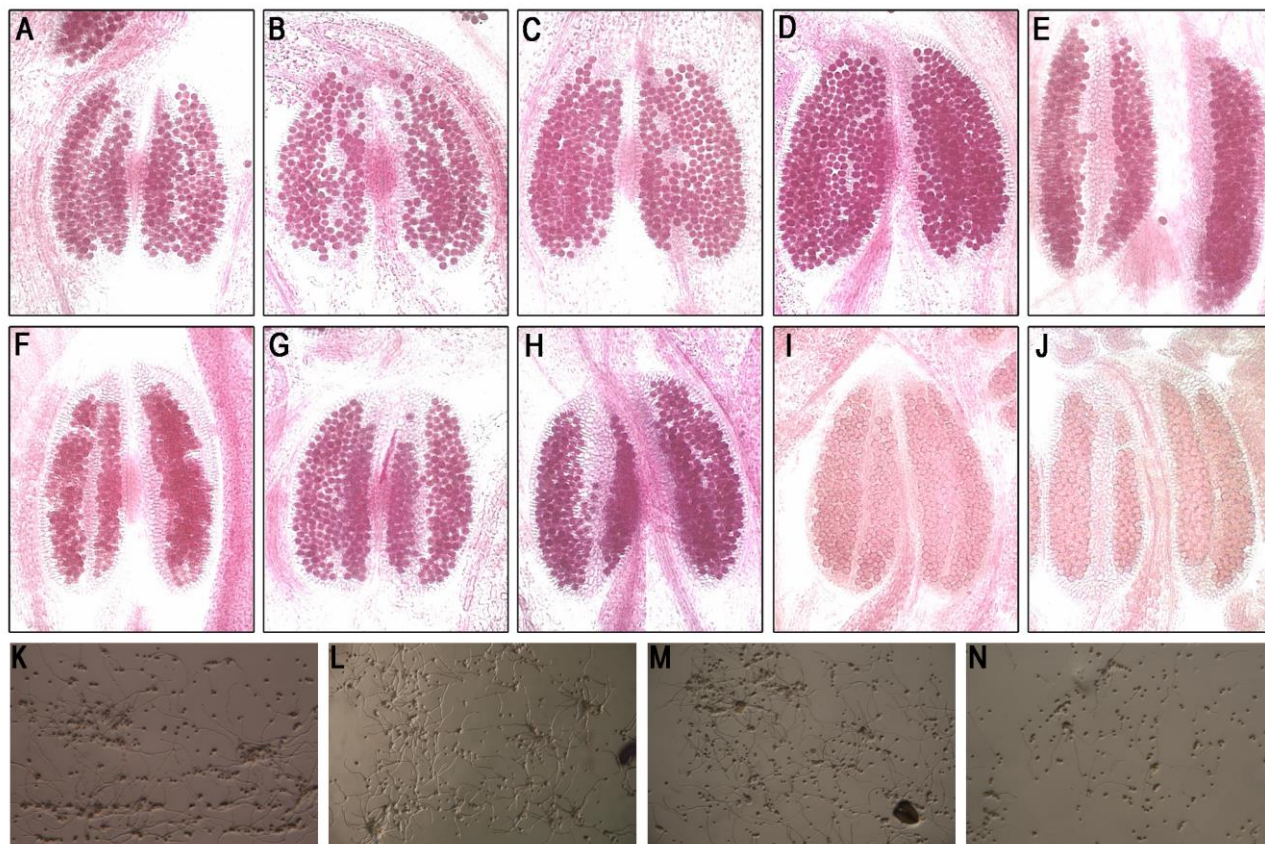

**Supplemental Figure 2.** Alexander Staining of the Anthers from WW Plants and DT Plants.

(A)-(E) The staining result of anthers collected from WW plants on C0, C3, C5, C7, C9. (F)-(J) The staining result of anthers collected from DT plants on T0, T3, T5, T7, T9. (K)-(N) The *in vitro* germination assay of the pollens from WW plants on C3(K) and C7(M) comparing with those from DT plants on T3(L) and T7(N).

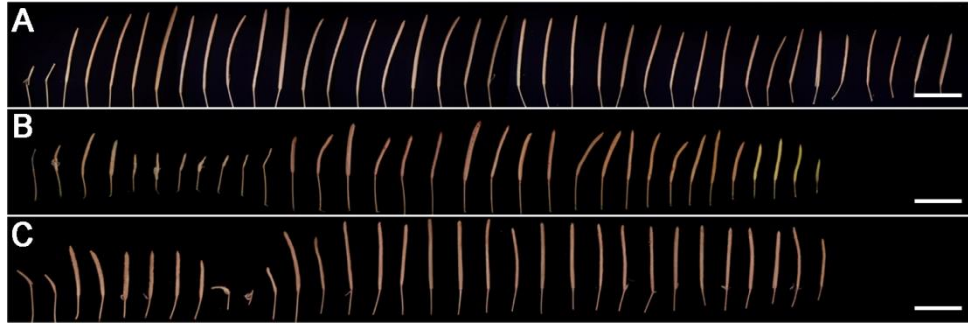

**Supplemental Figure 3. Silique Growth was Affected by Drought Stress.**

(A) All siliques from a WW plant. The siliques (left to right) were collected one at a time from the bottom to the top of the main inflorescence stem. (B) All siliques from a DT plant main inflorescence, similar to those in (A). (C) All siliques produced from the DT pistil (DPi) pollinated with pollen grains (WP) from WW plants.



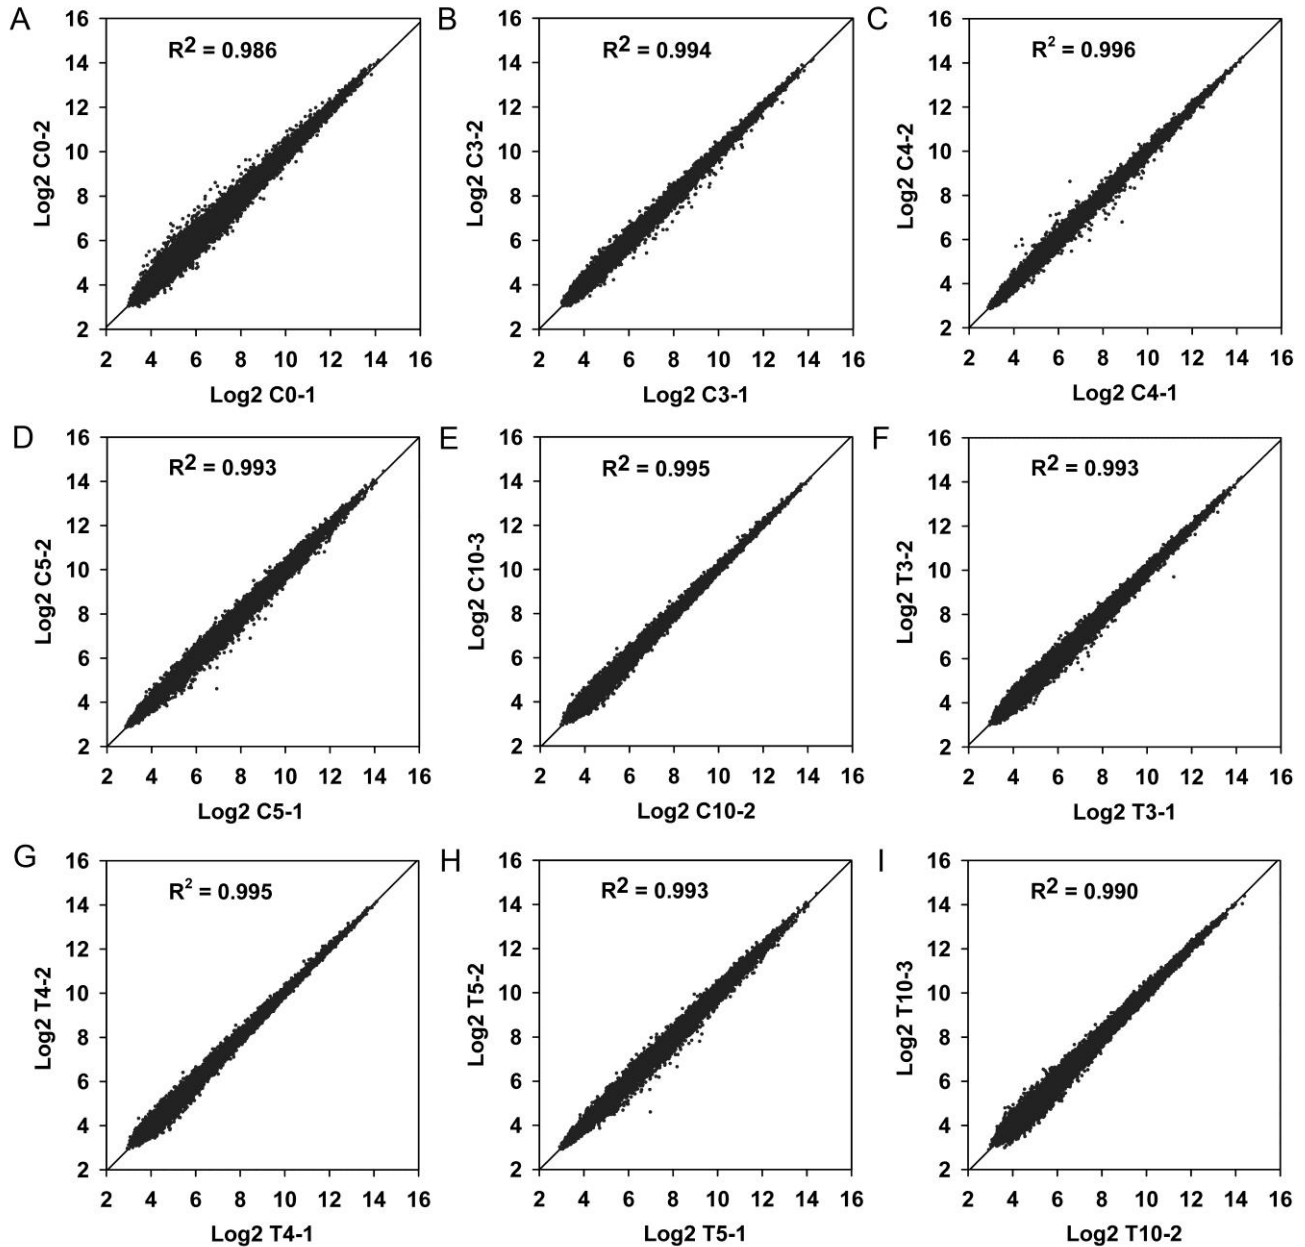

**Supplemental Figure 4.** Correlation between Two Biological Replicates at Each Time Point.

The data for the linear analysis are based on log 2 of the expression data. (A) C0 is the inflorescence from the plants grown on well watered condition for 24 days, we use this time point as our start point of the drought treatment; (B) C3 is the inflorescence from around 28-day-old plant with well watered condition; (C) C4 is the inflorescence from around 29-day-old plant with well watered condition; (D) C5 is the inflorescence from around 30-day-old plant with well watered condition; (E) C10 is the

inflorescence from around 34-day-old plant with well watered condition; **(F)** T3 is the inflorescence from the 28-day-old plant withholding water for 3 days; **(G)** T4 is the inflorescence from the 29-day-old plant withholding water for 4 days; **(H)** T5 is the inflorescence from the 30-day-old plant withholding water for 5 days; **(I)** T10 is the inflorescence from the 34-day-old plant withholding water for 10 days.  $R^2$  is the square of the correlation coefficient which stands for the Pearson's coefficient between replicates.

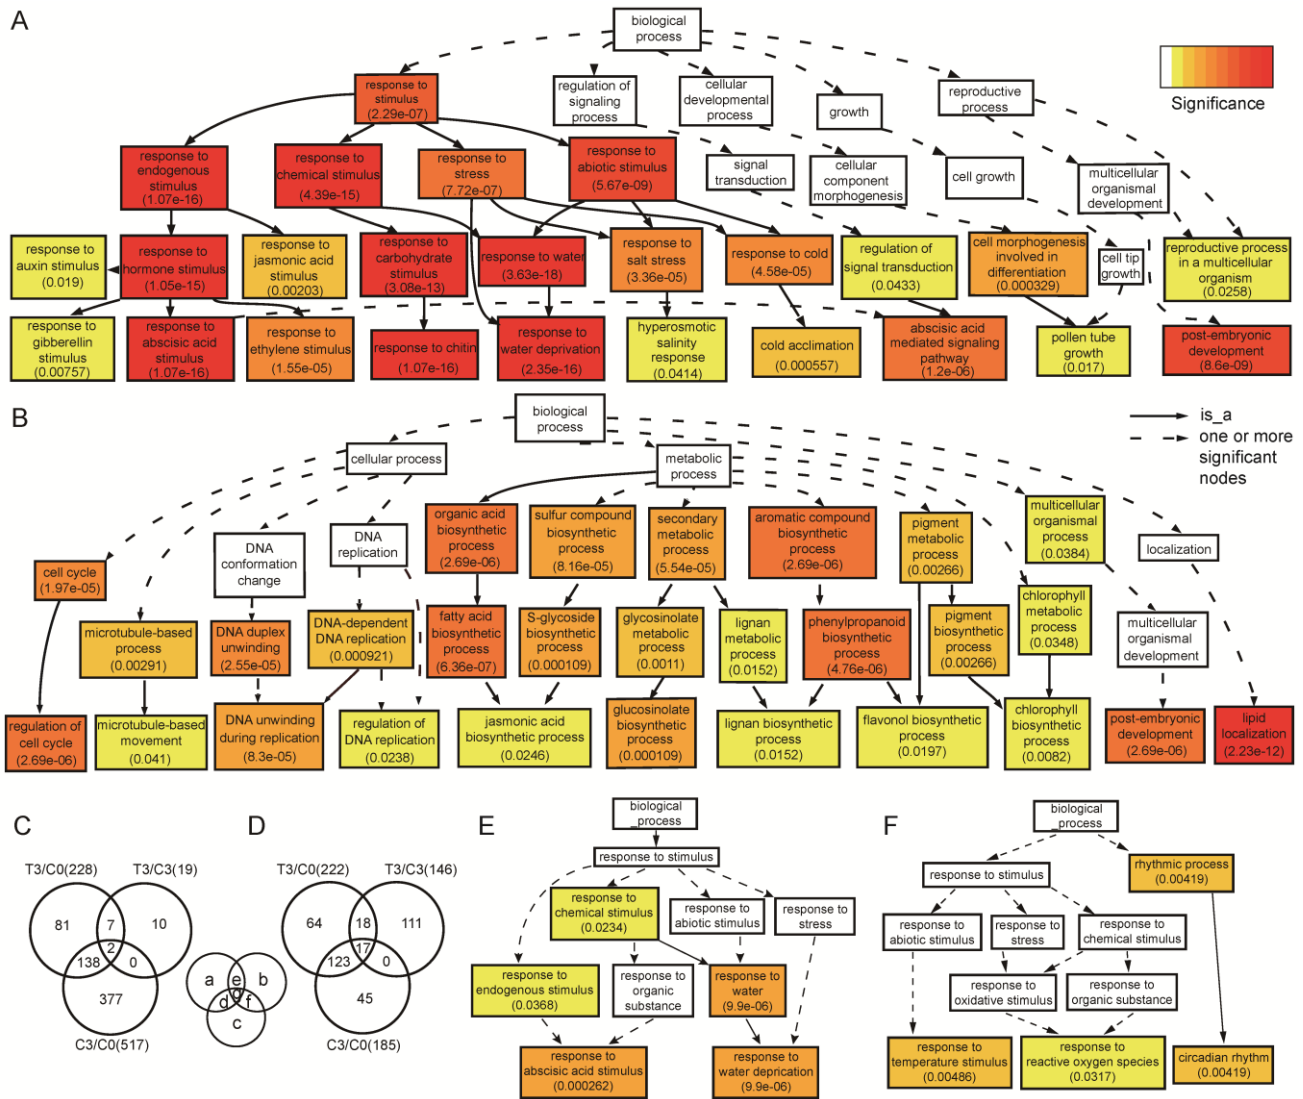

**Supplemental Figure 5.** The Venn Diagram and Enrichment Analysis of Differentially Expressed Genes.

(A) The enrichment analysis of all up-regulated genes with p-values. The reder the filled color is, the more significant the group is. (B) The enrichment analysis of all down-regulated genes with p-values. (C) The Venn Diagram of up-regulated genes differential expressed at T3 from 3 different comparing groups. (D) The Venn Diagram of down-regulated genes differential expressed at T3 from 3 different comparing groups. (E) The enrichment analysis of the genes combined from a b e groups (98 genes) of up-regulated genes at T3. (F) The enrichment analysis of the genes combined from a b e groups (193 genes) of down-regulated genes at T3.

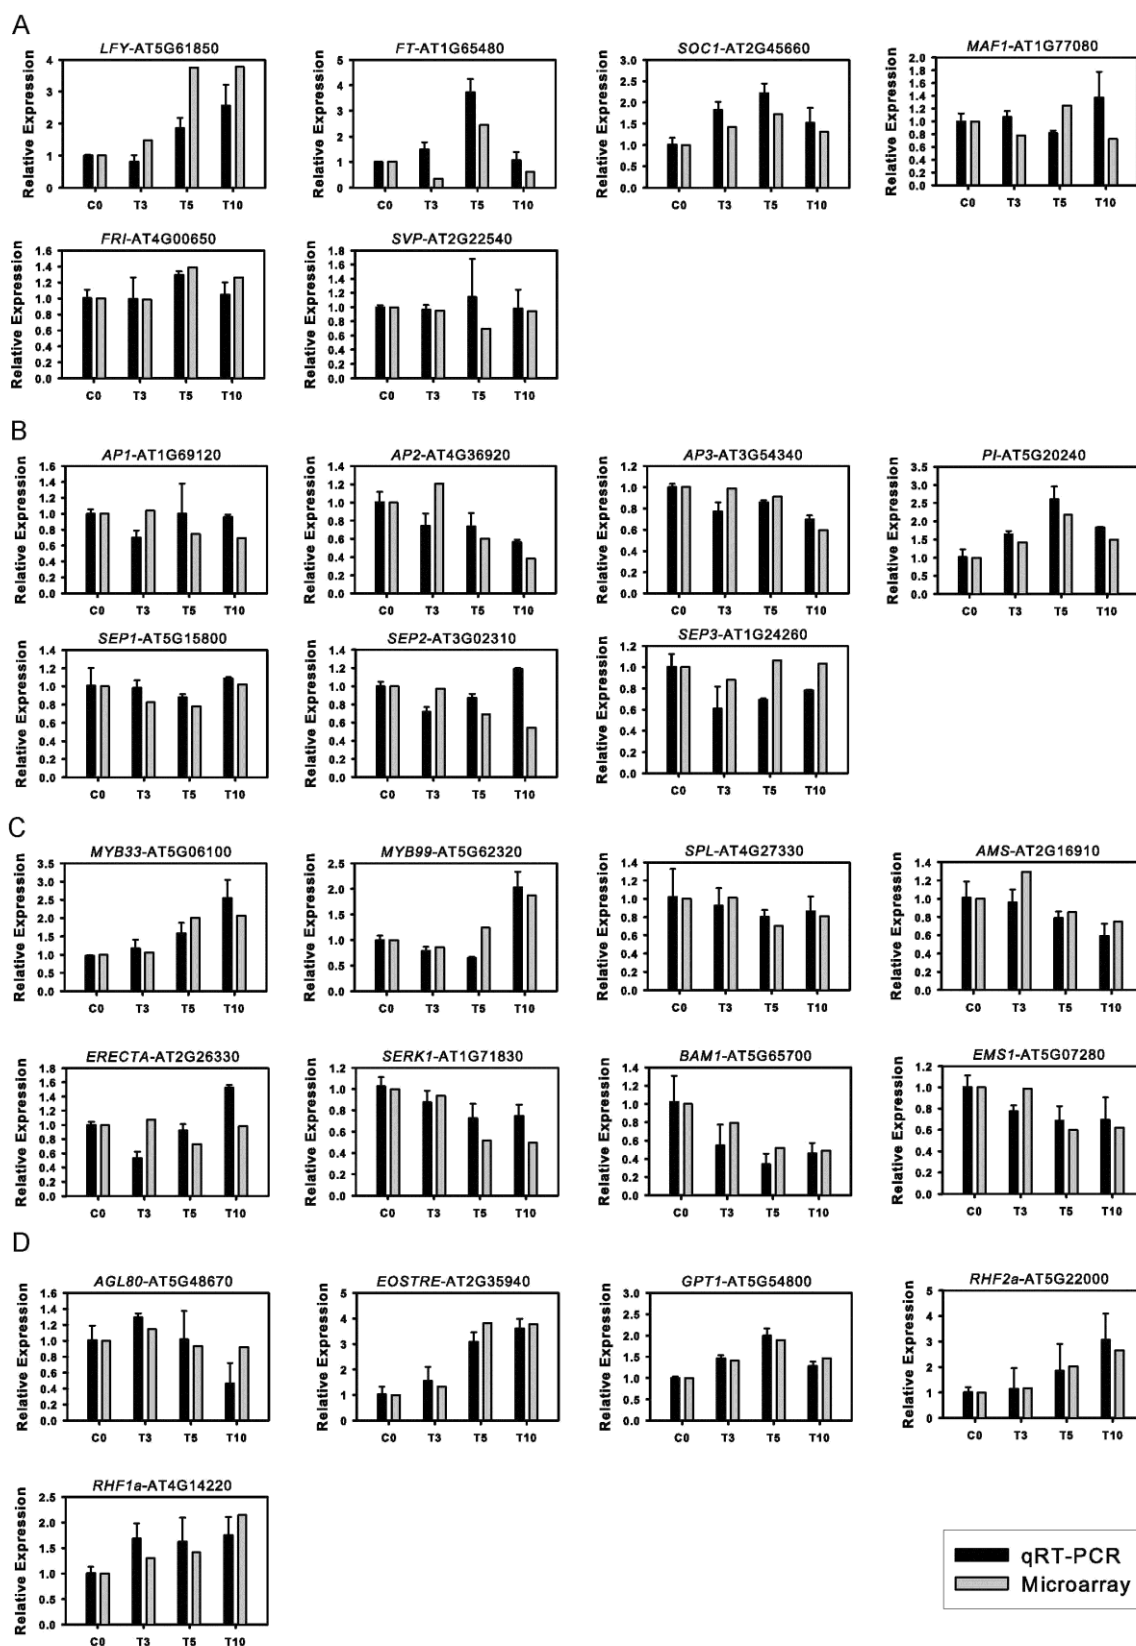

Supplemental Figure 6. QPCR Verification of Microarray Data.



**(A)** The flowering time related genes. **(B)** ABC model genes. **(C)** Anther development genes. **(D)** Pistil development genes.

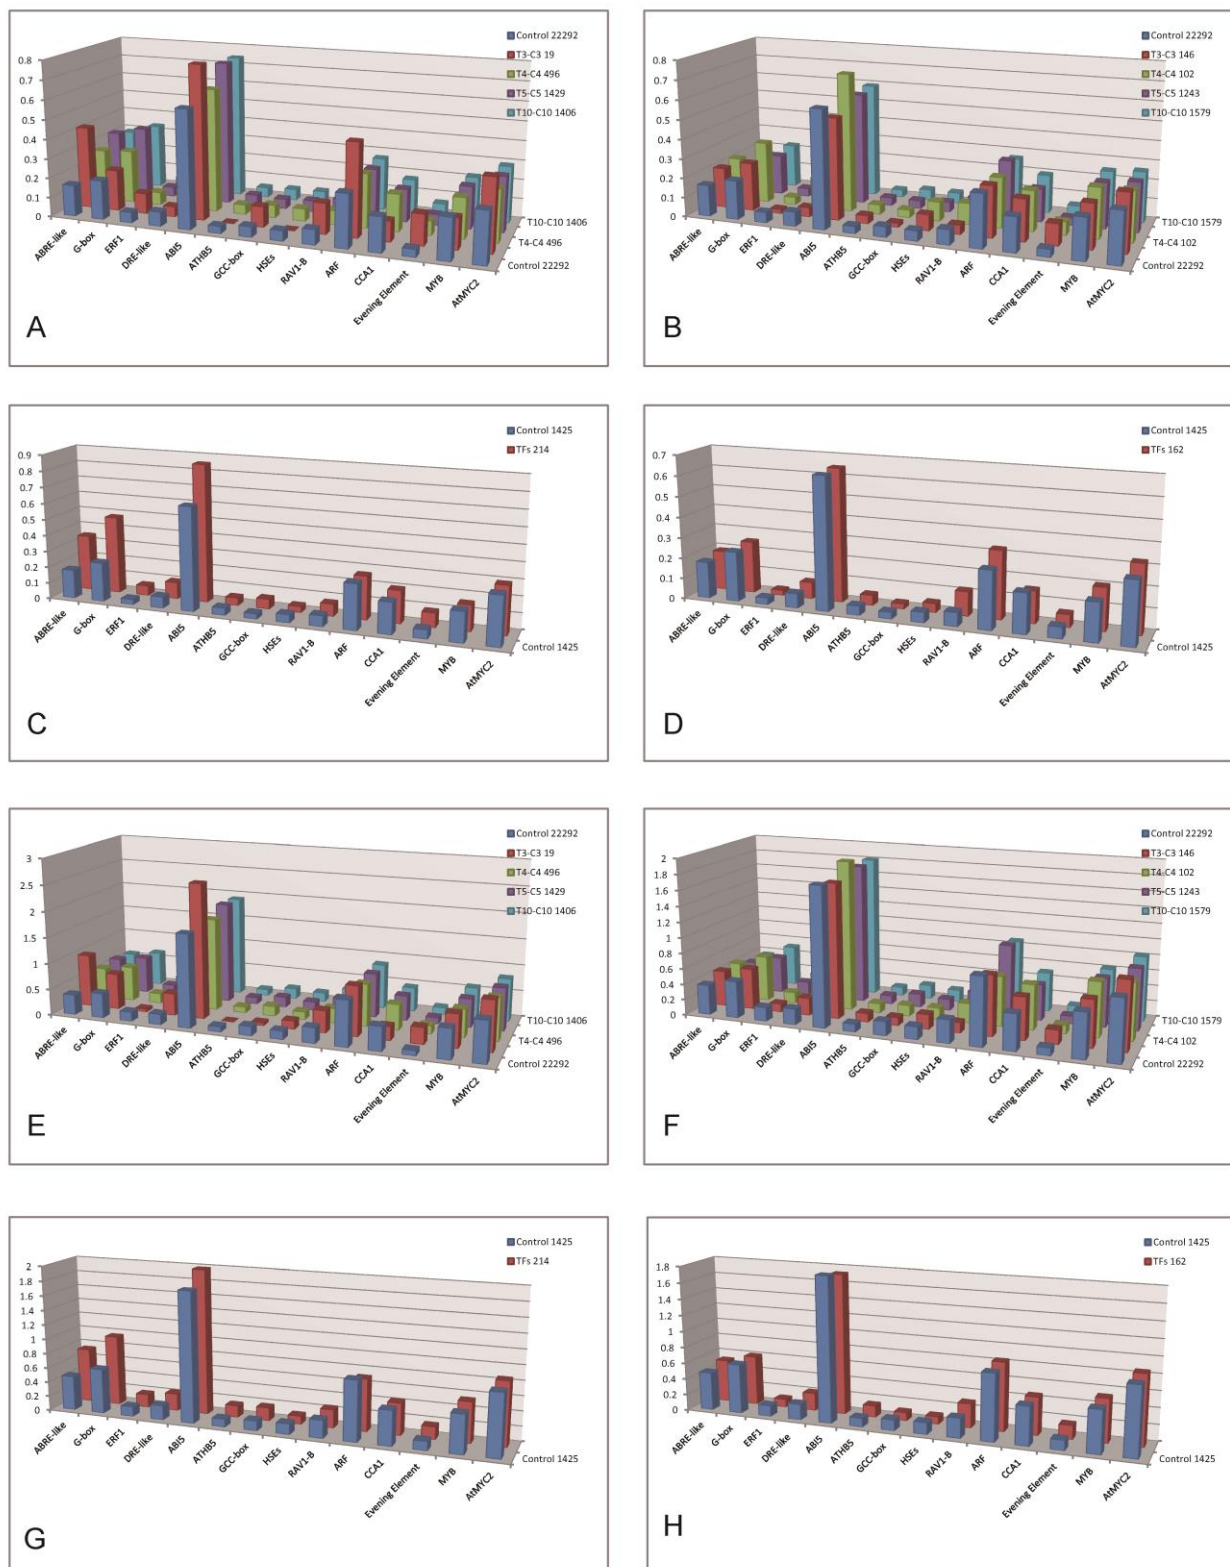

**Supplemental Figure 7.** *cis*-Regulatory Element Analysis of 1 kb and 3 kb Promoters of Differentially Expressed Genes.

(A) *cis*-regulatory element (CRE) analysis within 1000bp promoter of all up-regulated genes. (B) CRE analysis within 1000bp promoter of all down-regulated genes. (C) CRE analysis within 3000bp promoter of all up-regulated transcription factors. (D) CRE analysis within 3000bp promoter of all down-regulated transcription factors.

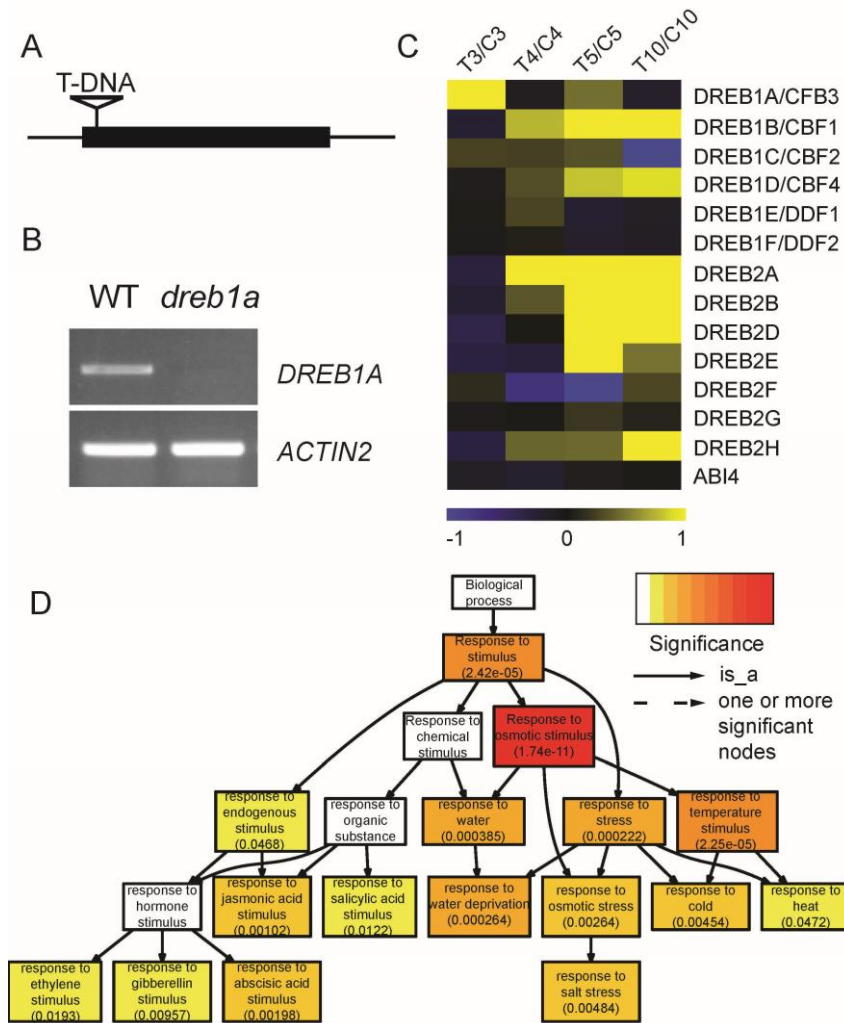

**Supplemental Figure 8.** The *dreb1a* T-DNA Mutant Information and *DREB* Genes Expression Pattern under Drought Stress in Flower.

(A) T-DNA insertion of *dreb1a* (CS872453). (B) RT-PCR results of *DREB1A* gene expression in WT and *dreb1a* mutant. (C) The heat map of *DREB* family genes expression pattern in flower under drought stress. (D) Enrichment analysis of the genes that up-regulated in wild type T3 compared with *dreb1a* T3.

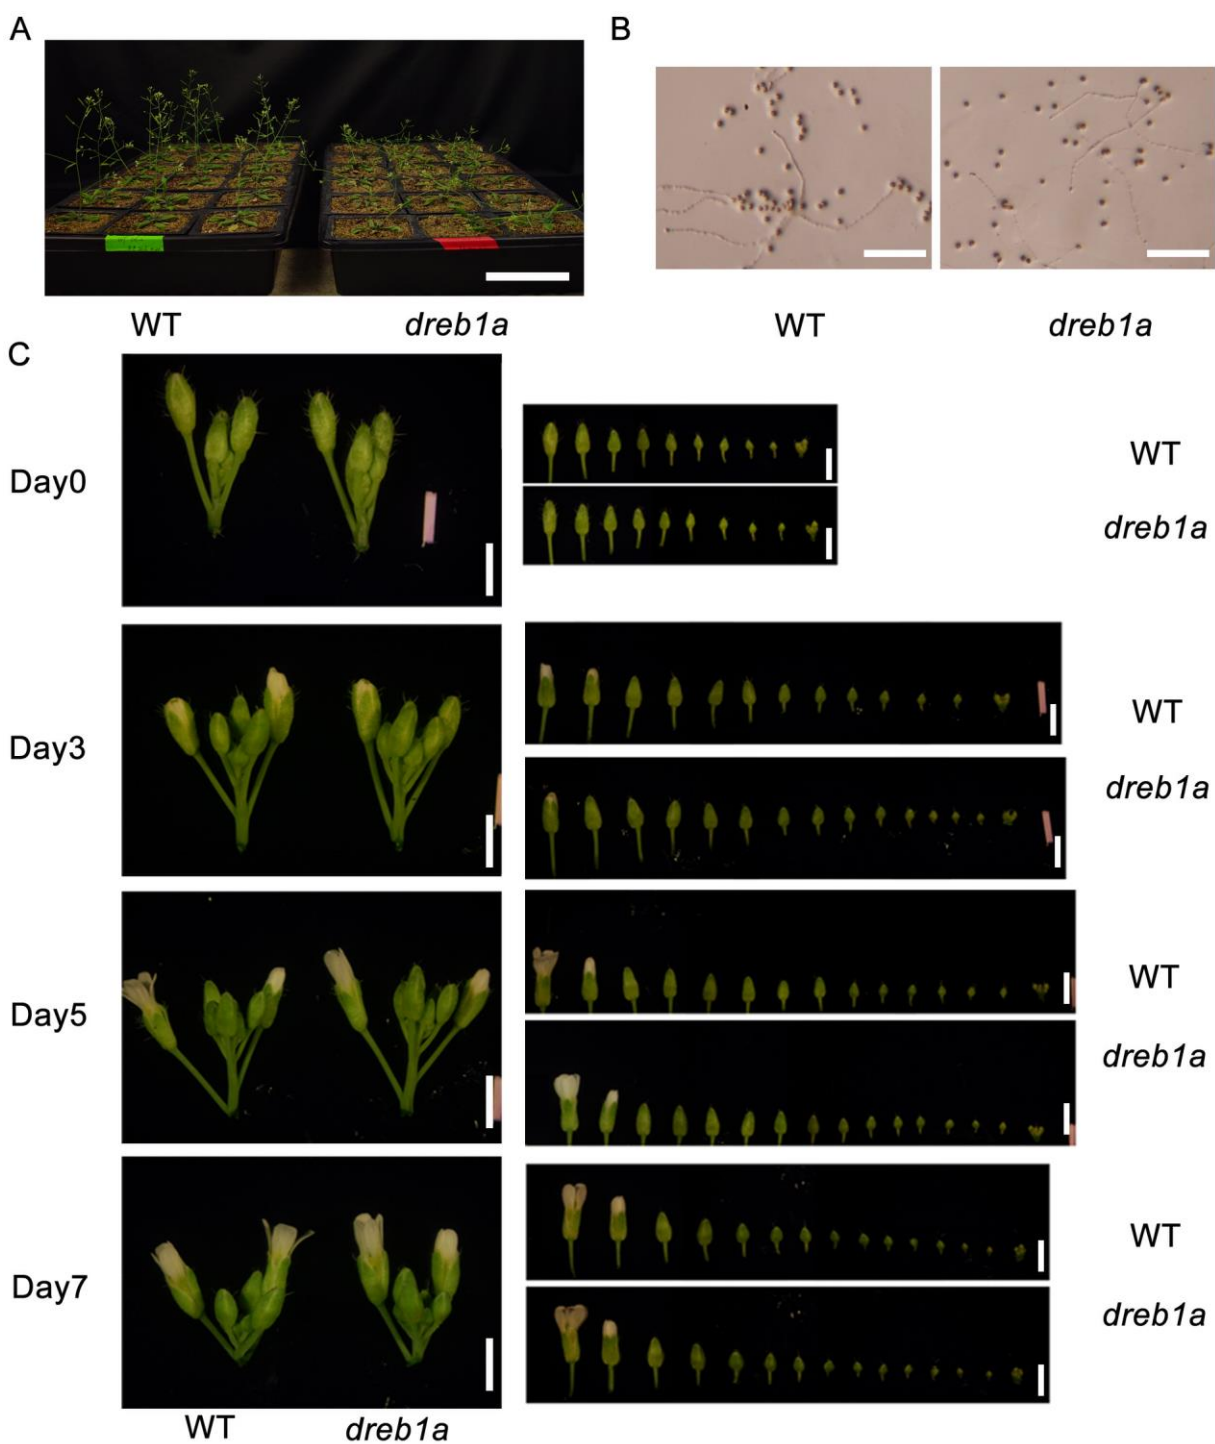

**Supplemental Figure 9.** Phenotypic Analyses of *dreb1a* Compared with WT under Early Drought Stress.

(A) WT and *dreb1a* plants after 7 days of drought treatment. Bars = 5 cm. (B) *in vitro* germination assay of the pollens from the newly open flowers of WT and *dreb1a* plants at T7. Bars = 500  $\mu$ m. (C)

Inflorescence and floral buds phenotype characterization (From C0 to T7). WT inflorescence (left) and *drebla* inflorescence (right). The floral buds (stage 8-12) were dissected off with 0-2 open flowers from WW plants (Upper panel) and *drebla* (lower panel), Bars = 2 mm.



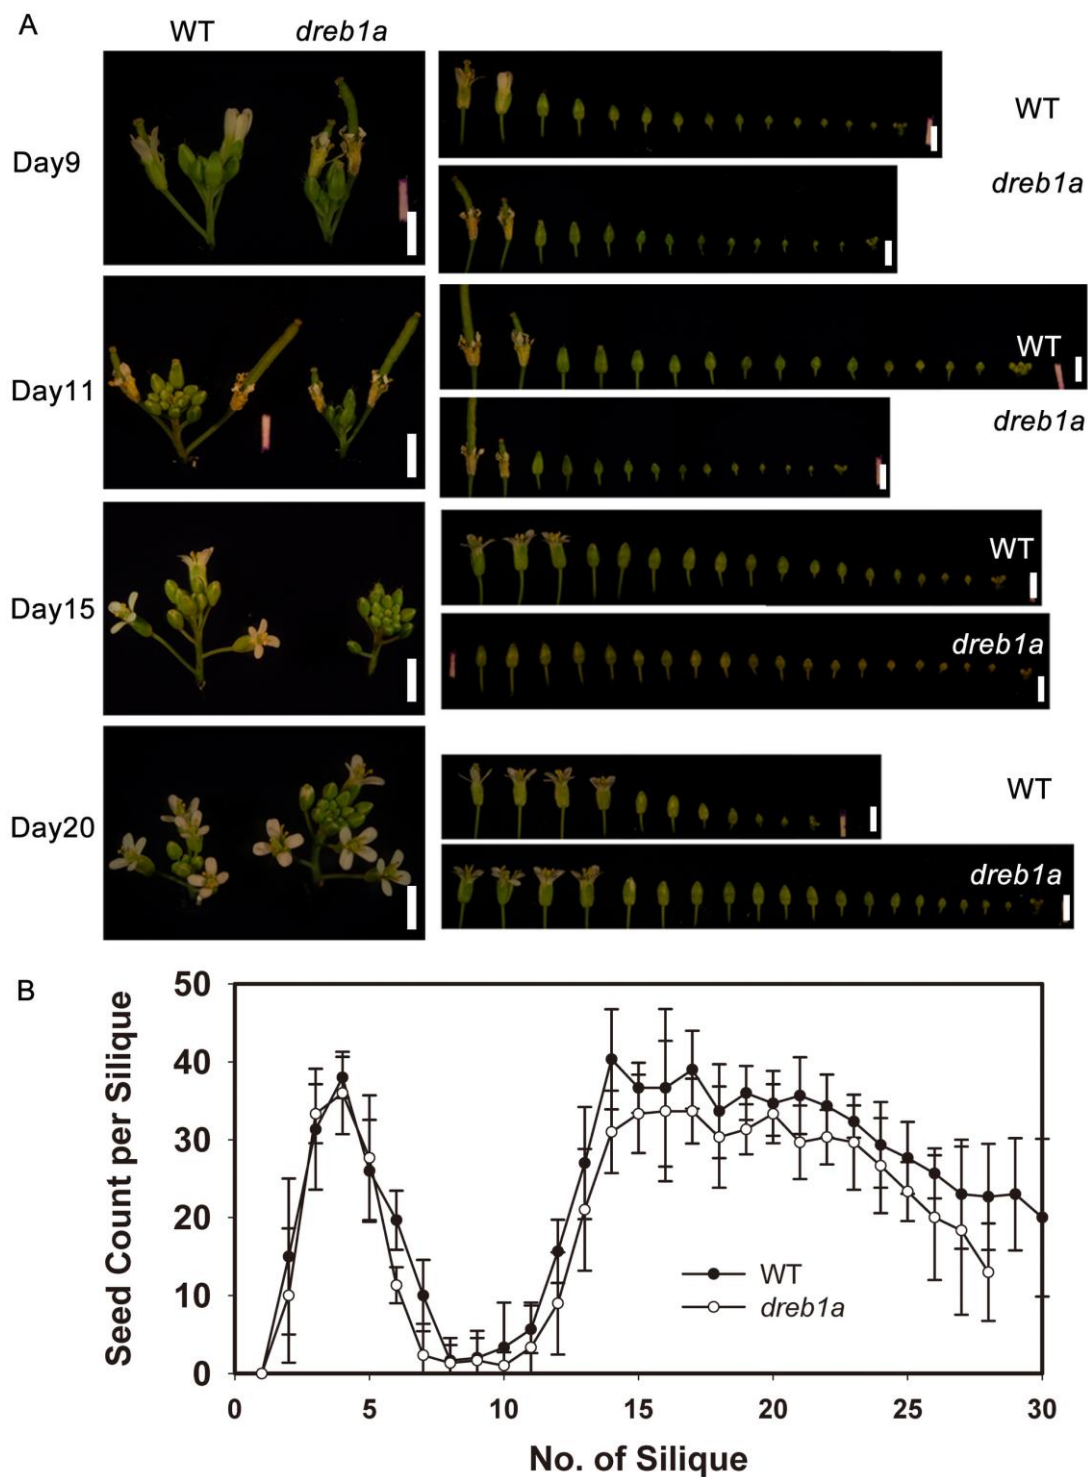

**Supplemental Figure 10.** Phenotypic Analyses of *dreb1a* Compared with WT under Prolonged Drought Stress.

(A) Inflorescence and floral buds phenotype characterization (From T9 to T20). WT inflorescence

(left) and *drebla* inflorescence (right). The floral buds (stage 8-12) were dissected off with 0-2 open flowers from WW plants (Upper panel) and *drebla* (lower panel). Bars = 2 mm. **(B)** Seeds count per silique from most bottom one to the top one.

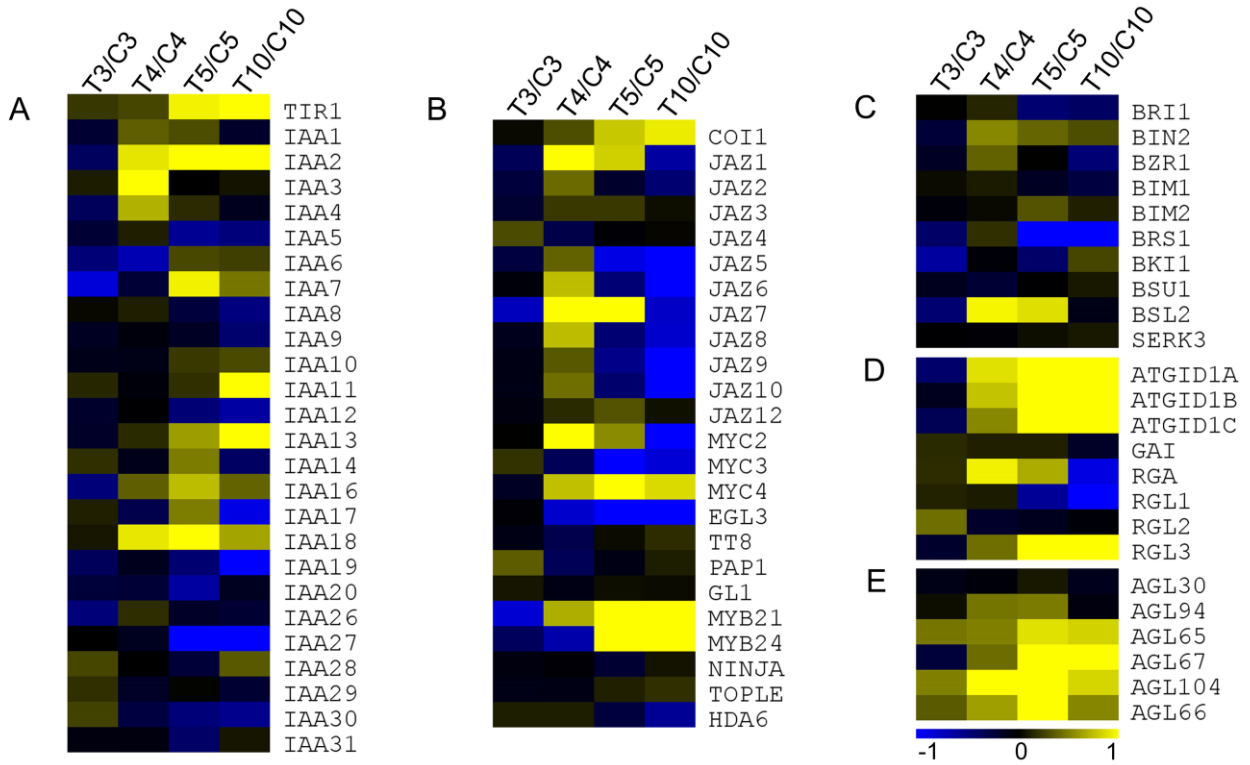

**Supplemental Figure 11.** Expression Pattern Change of Key Phytohormone Pathway Genes under Drought Stress.

(A) Auxin pathway gene expression changes under drought. (B) JA pathway gene expression changes under drought. (C) BR pathway gene expression changes under drought. (D) GA pathway gene expression change under drought. (E) MADS-box family Mδ subfamily gene expression changes under drought.

**Supplemental Table 1.** The Number of Genes which Expression Levels Were Above the 50 Threshold (log<sub>2</sub> value > 5.64) in Each Dataset and The Number of Genes Which Were Differentially Expressed in Each Dataset Compared with Multiple Controls.

| Sample                | C0           | C3           | C4           | C5            | C10          | T3           | T4            | T5             | T10   |
|-----------------------|--------------|--------------|--------------|---------------|--------------|--------------|---------------|----------------|-------|
| <b>Gene Count</b>     | 15067        | 15244        | 15232        | 15230         | 15051        | 15168        | 15154         | 15158          | 15014 |
|                       |              | <b>T3/C3</b> |              | <b>T4/C4</b>  |              | <b>T5/C5</b> |               | <b>T10/C10</b> |       |
| <b>Up-regulated</b>   |              | 19           |              | 462           |              | 1377         |               | 1395           |       |
| <b>Down-regulated</b> |              | 145          |              | 101           |              | 1230         |               | 1567           |       |
|                       | <b>T3/C0</b> | <b>T4/C0</b> | <b>T5/C0</b> | <b>T10/C0</b> | <b>T3/C3</b> | <b>T4/C3</b> | <b>T5/C3</b>  | <b>T10/C3</b>  |       |
| <b>Up-regulated</b>   | 228          | 955          | 1984         | 1825          | 19           | 710          | 1782          | 1511           |       |
| <b>Down-regulated</b> | 222          | 341          | 1562         | 1794          | 145          | 384          | 1555          | 1682           |       |
|                       | <b>C3/C0</b> | <b>C4/C0</b> | <b>C5/C0</b> | <b>C10/C0</b> | <b>C4/C3</b> | <b>C5/C3</b> | <b>C10/C3</b> |                |       |
| <b>Up-regulated</b>   | 517          | 469          | 262          | 467           | 205          | 130          | 216           |                |       |
| <b>Down-regulated</b> | 185          | 218          | 106          | 275           | 271          | 167          | 398           |                |       |

**Supplemental Table 2.** GO Annotation of Genes Differentially Expressed at T3 v. C3.

| Gene ID                                    | Gene Name and Description                                                                                  | T3/C3 | Q Value  |
|--------------------------------------------|------------------------------------------------------------------------------------------------------------|-------|----------|
| Transporter activity<br>AT1G61800          | Glucose-6-phosphate/phosphate translocator 2 (GPT2)                                                        | 2.5   | 1.34E-05 |
| Transcription factor activity<br>AT4G25480 | Dehydration response element binding protein 1a (DREB1A)                                                   | 1.1   | 6.65E-03 |
| DNA or RNA binding<br>ATCG00660            | Ribosomal protein L20 (RPL20)                                                                              | 1.28  | 1.14E-03 |
| AT1G69260                                  | ABI FIVE binding protein (AFP1)                                                                            | 1.43  | 2.34E-05 |
| Transferase activity<br>AT1G19640          | Jasmonic acid carboxyl methyltransferase (JMT)                                                             | 1.11  | 7.98E-03 |
| Hydrolase activity<br>AT1G07430            | Highly ABA-induced PP2C gene (HAI2)                                                                        | 1.74  | 2.04E-04 |
| AT1G62710                                  | Beta vacuolar processing enzyme (BETA-VPE)                                                                 | 1.28  | 9.72E-04 |
| Other binding<br>AT3G53980                 | Lipid-transfer protein                                                                                     | 1.27  | 1.18E-05 |
| AT4G33550                                  | Lipid-transfer protein                                                                                     | 1.12  | 1.07E-03 |
| AT5G03350                                  | Legume lectin family protein                                                                               | 1.15  | 5.18E-03 |
| AT5G55450                                  | Lipid-transfer protein                                                                                     | 1.02  | 8.39E-03 |
| Unknown molecular functions<br>AT1G52690   | Late embryogenesis abundant 7 (LEA7)                                                                       | 2.03  | 7.42E-06 |
| AT4G35190                                  | Putative lysine decarboxylase family protein                                                               | 1.08  | 5.96E-04 |
| AT5G52310                                  | Cold regulated 78 (COR78);<br>Low-temperature-induced 78 (LTI78);<br>Responsive to desiccation 29A (RD29A) | 2.4   | 1.07E-05 |
| AT5G52390                                  | PAR1 protein                                                                                               | 1.44  | 3.02E-05 |
| AT1G80130                                  | unknown protein                                                                                            | 2.15  | 3.81E-06 |
| AtCG00530                                  | hypothetical protein                                                                                       | 1.07  | 4.89E-04 |
| AT1G19960                                  | Unknown protein                                                                                            | 1.76  | 8.95E-03 |
| Other molecular functions<br>ATCG00590     | hypothetical protein (ORF31)                                                                               | 1.7   | 4.56E-03 |

**Supplemental Table 3.** The Expression of DREB Genes in *Arabidopsis* Flower under Drought Stress.

| Gene ID   | Name        | cis element | Gene                | T3/C3 | Q Value | T4/C4 | Q Value | T5/C5 | Q Value | T10/C10 | Q Value |
|-----------|-------------|-------------|---------------------|-------|---------|-------|---------|-------|---------|---------|---------|
| AT4G25480 | DREB1A/CBF3 | DRE/CRT     | <i>RD29A Cor15a</i> | 1.10  | 0.01    | -0.14 | 0.36    | 0.40  | 0.05    | -0.48   | 0.01    |
| AT4G25490 | DREB1B/CBF1 | DRE/CRT     | <i>RD29A Cor15a</i> | -0.28 | 0.56    | 0.66  | 0.08    | 1.32  | 0.00    | 1.27    | 0.00    |
| AT4G25470 | DREB1C/CBF2 | DRE/CRT     | <i>RD29A Cor15a</i> | 0.19  | 0.55    | 0.23  | 0.24    | 0.22  | 0.14    | -0.99   | 0.00    |
| AT5G51990 | DREB1D/CBF4 | DRE/CRT     | <i>RD29A Cor15a</i> | -0.12 | 0.60    | 0.26  | 0.15    | 0.80  | 0.00    | 0.70    | 0.00    |
| AT1G12610 | DREB1E/DDF1 |             |                     | -0.04 | 0.69    | 0.07  | 0.37    | -0.17 | 0.09    | -0.08   | 0.14    |
| AT1G63030 | DREB1F/DDF2 |             |                     | 0.08  | 0.66    | 0.24  | 0.17    | -0.30 | 0.05    | -0.31   | 0.02    |
| AT5G05410 | DREB2A      | DRE         | <i>RD29A</i>        | -0.28 | 0.50    | 1.37  | 0.00    | 4.02  | 0.00    | 4.57    | 0.00    |
| AT3G11020 | DREB2B      | DRE         | <i>RD29A</i>        | -0.13 | 0.65    | 0.23  | 0.27    | 0.87  | 0.00    | 1.98    | 0.00    |



**Supplemental Table 4.** Primers for QPCR.

| Gene Name | AGI       | oMC #              | Sequence                                            | Amplicon Size(bp) |
|-----------|-----------|--------------------|-----------------------------------------------------|-------------------|
| ACTIN2    | AT3G18780 | oMC1533<br>oMC1534 | GGTAACATTGTGCTCAGTGGTGG<br>AACGACCTTAATCTTCATGCTGC  | 108               |
| SPL       | At4g27330 | oMC2362<br>oMC2363 | TCCAACGGTGGTGGATTTTC<br>TGGTCCCCTATGATTTGTTGC       | 200               |
| DYT1      | At4g21330 | oMC1872<br>oMC1834 | ATGGGTGGAGGAAGCAGATTTTC<br>TTATGGATTGCTTCTCATAACTTC | 153               |
| EMS1      | At5g07280 | oMC2364<br>oMC2365 | CTCATCTCCTTCAAGCGCTCA<br>AGACACGTAACGCCAACCCA       | 101               |
| TPD1      | At4g24972 | oMC2366<br>oMC2367 | GGTATCGGCGACTGCTCT<br>CCAATTCTCTCCGGCTCTACA         | 201               |
| AMS       | At2g16910 | oMC2368<br>oMC2369 | TTCCCATCTTCCAGCTTCCA<br>ACCACGTTCTGATCTTCAGCG       | 201               |
| AG        | AT4G18960 | oMC7717<br>oMC7718 | GAGCTCAGGAACTTGGAAAGG<br>TCTTTGCACGAAGAATCTGG       | 145               |
| AGL24     | AT4G24540 | oMC7719<br>oMC7720 | AGTTCTTTGCGATGCTGATG<br>AGCTGGAGAACTCGAAGAGC        | 71                |
| AP1       | AT1G69120 | oMC7721<br>oMC7722 | TCTCAACATGGGTGGTCTGT<br>GCCAAGGTTGCAGTTGTA AAA      | 100               |
| AP2       | AT4G36920 | oMC7723<br>oMC7724 | ACTCAATGCCGAGTCATCAG<br>GAATTAGCCGAATTTCCCAA        | 81                |
| AP3       | AT3G54340 | oMC7725<br>oMC7726 | GAGTGTTTGGACGAGCTTGA<br>TTCTTGGTGGTCTCGATCTG        | 125               |
| FRI       | AT4G00650 | oMC7727<br>oMC7728 | TGGTTCACGGACAGAGACAT<br>ACTGCGAGGAGACCTTTGAT        | 146               |
| FT        | AT1G65480 | oMC7729<br>oMC7730 | CCTTTGGCAATGAGATTGTG<br>GCCAAGCTGTTCGAAACAATA       | 89                |
| LFY       | AT5G61850 | oMC7731<br>oMC7732 | AGAGCTGAACGGAGACGATT<br>GCATCAAGAGCGTGATGAGT        | 110               |
| MAF1      | AT1G77080 | oMC7733<br>oMC7734 | GATCAAGCGAATCGAGAACA<br>GAGCTTTGTGCGATGAGACCA       | 77                |
| PI        | AT5G20240 | oMC7735<br>oMC7736 | AGCTGCAACAACAGGAGATG<br>GCTGAATCGGTTGCACTCTA        | 99                |
| SEP1      | AT5G15800 | oMC7737<br>oMC7738 | TCATATGGGAGGAGGAGGAG<br>CCATTTGCAGAGTTGGATTG        | 119               |
| SEP2      | AT3G02310 | oMC7739<br>oMC7740 | GCTTTGTCAATGAAGCTGGA<br>TGAGAATGAGCCTGAGGATG        | 116               |
| SEP3      | AT1G24260 | oMC7741<br>oMC7742 | ACTATGGAGCACCAGAACCC<br>GGTCCAAGATCTTCTCCCAA        | 142               |
| SOC1      | AT2G45660 | oMC7743<br>oMC7744 | TCAGTGCTTTGTGATGCTGA<br>TGGTGCTGACTCGATCCTTA        | 133               |
| SVP       | AT2G22540 | oMC7745<br>oMC7746 | CTGCTGTGTACGAGGAAGGA<br>ATACGGTAAGCCGAGCCTAA        | 116               |
| BAM1      | AT5G65700 | oMC7761<br>oMC7762 | GTTCGTTTCCCGATGAGATT<br>CCGGTAAATCTCCGGTTAGA        | 87                |
| BAM2      | AT3G49670 | oMC7763<br>oMC7764 | GTTCAATACCGATTTCGCTT<br>GAAGAGCTCCTTTGGAATCG        | 95                |
| BAM3      | AT4G17090 | oMC7765            | TCTCAGGCAAGTTTCCTCCT                                | 97                |

|        |           |         |                       |     |
|--------|-----------|---------|-----------------------|-----|
|        |           | oMC7766 | ATCTGAACCGGAATCTGACC  |     |
| ERECTA | AT2G26330 | oMC7767 | TCACGGCTCACTGAGAAATC  | 147 |
|        |           | oMC7768 | TGCCATTTCCATCACTTCAT  |     |
| MYB110 | AT3G29020 | oMC7769 | ACTCAACCTTCCCTGCAGAT  | 98  |
|        |           | oMC7770 | TGTTGATGATGATGGCAGTG  |     |
| MYB33  | AT5G06100 | oMC7771 | TATCAAGAGGCGACAACGAG  | 74  |
|        |           | oMC7772 | GACTCCACTCAAGTGCCTCA  |     |
| MYB65  | AT3G11440 | oMC7773 | CATCGCAGGTAGAGGAGTCA  | 109 |
|        |           | oMC7774 | ATCAACAAACTGTGCTTCGC  |     |
| MYB99  | AT5G62320 | oMC7775 | ATCGTCGATTTGACCAACAA  | 113 |
|        |           | oMC7776 | TGCTGACGTGTCATTCTTCA  |     |
| SERK1  | AT1G71830 | oMC7777 | TGGGTGAAAGGATTGTTGAA  | 143 |
|        |           | oMC7778 | TTTGGTCTTTCCATTGGTGA  |     |
| AGL23  | AT1G65360 | oMC7747 | TGATGTTCTGCTTGACCACTT | 130 |
|        |           | oMC7748 | TTCTACTTCCGCCTTCACCT  |     |
| AGL80  | AT5G48670 | oMC7749 | TCTCGACTCTTTGTGGCATC  | 81  |
|        |           | oMC7750 | AATTTGATGGCCCACTTCA   |     |
| EOSTRE | AT2G35940 | oMC7751 | TGGTGATCTCTTCGTTTCGAG | 103 |
|        |           | oMC7752 | TCTTTCAAGCAACGGAAGT   |     |
| GPT1   | AT5G54800 | oMC7753 | GGACCACAGTTTGTCTGGTG  | 133 |
|        |           | oMC7754 | CGGAGATACGTTTCATGGTG  |     |
| MYB98  | AT4G18770 | oMC7755 | AGTGTTACCGGGAAGAATCG  | 147 |
|        |           | oMC7756 | ATCTCTGCCATTTGTTTCC   |     |
| RHF1a  | AT4G14220 | oMC7757 | AAGGAGTGCAACGTGAGATG  | 121 |
|        |           | oMC7758 | GCAGTAGCAGTGGAGGTTGA  |     |
| RHF2a  | AT5G22000 | oMC7759 | CAGCCACCAACTTCTTCTCA  | 69  |
|        |           | oMC7760 | AAGAGGCCTGCTGTTTGAAT  |     |
